# Supplementary material for: Modification of a SERS-active Ag surface to promote adsorption of charged analytes: effect of Cu 2+ ions
Source: publisher site journal article supplement (doi:10.3762/bjnano.12.67), 2021-08-16
Supplement: Additional file 1 [file 2190-4286-12-67-S1.pdf]

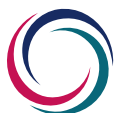

## Supporting Information

for

### **Modification of a SERS-active Ag surface to promote adsorption of charged analytes: effect of Cu<sup>2+</sup> ions**

Bahdan V. Ranishenka, Andrei Yu. Panarin, Irina A. Chelnokova, Sergei N. Terekhov, Peter Mojzes and Vadim V. Shmanai

*Beilstein J. Nanotechnol.* **2021**, *12*, 902–912. [doi:10.3762/bjnano.12.67](https://doi.org/10.3762/bjnano.12.67)

### **Characterization of silver nanostructures**

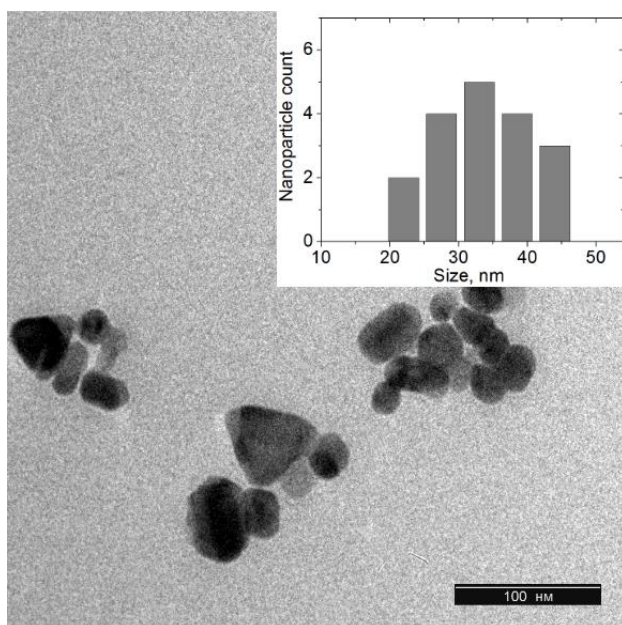

**Figure S1:** TEM image of silver nanoparticles and corresponding size distribution histogram. The TEM sample was prepared by simple drop-casting.

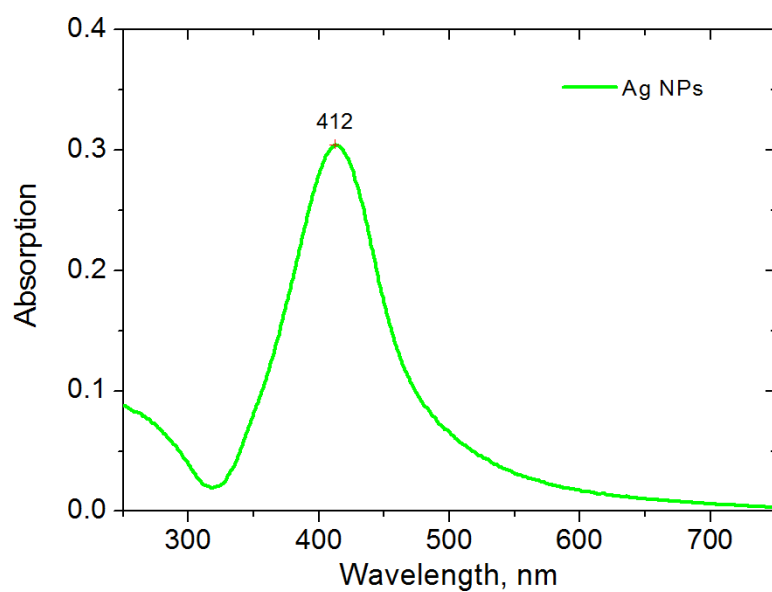

**Figure S2:** Absorption spectrum of the colloidal silver NPs.

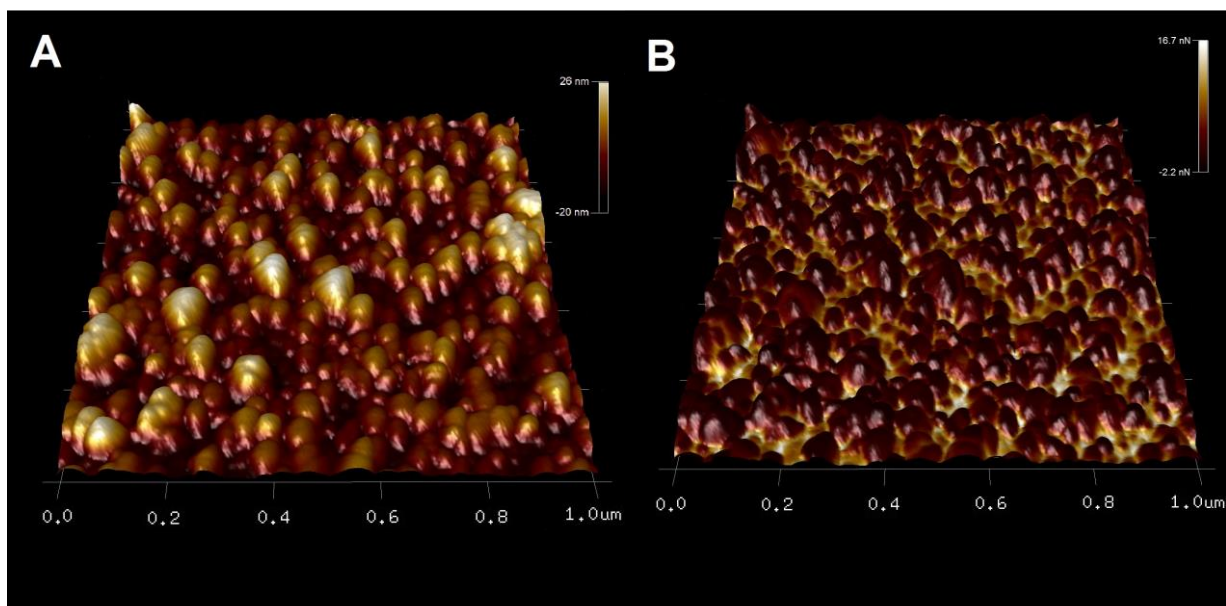

**Figure S3:** AFM images of silver NPs immobilized on a PEI-modified silicon support. A) Topological map; B) adhesive properties map (scan size of  $1 \mu\text{m} \times 1 \mu\text{m}$ ; scan rate of 0.5 Hz ( $256 \times 256$  pixels); peak force setpoint of 0.5 nN).
